# Supplementary material for: What does social cognition look like in everyday social functioning in Huntington’s disease? A protocol for a scoping review to explore and synthesise knowledge about social cognition alongside day-to-day social functioning of people with Huntington’s disease
Source: PubMed Central journal article supplement (PMC10351301; doi:10.1136/bmjopen-2023-073655), 2023-07-14
Supplement: bmjopen-2023-073655supp001.pdf [file bmjopen-2023-073655supp001.pdf]

## Search strategy

| Database                                    | Stage                                                                                                                                                                                                          | Keywords                                                                                                                                                                                                                                                                                                                                             | Limits / other details                                                                                                                                                                                                                                                                                                      |
|---------------------------------------------|----------------------------------------------------------------------------------------------------------------------------------------------------------------------------------------------------------------|------------------------------------------------------------------------------------------------------------------------------------------------------------------------------------------------------------------------------------------------------------------------------------------------------------------------------------------------------|-----------------------------------------------------------------------------------------------------------------------------------------------------------------------------------------------------------------------------------------------------------------------------------------------------------------------------|
| Embase / Ovid<br>Medline (R) /<br>Psychinfo | 1. The umbrella scoping<br>review of pre-existing<br>systematic reviews                                                                                                                                        | Huntington* AND (<br>Social cogniti* OR<br>Social function OR<br>Social behaviour OR<br>Social interaction OR<br>Social judgement OR<br>Social psychology OR<br>Social understanding<br>OR Social skills OR<br>Social competence OR<br>Social communication<br>OR Social decision<br>making OR<br>Social withdrawal OR<br>avoidance OR<br>disengage) | Humans / English<br>Language / Review<br>articles / 2003 to<br>current (June 2023)<br><br>Reference lists of<br>articles which are<br>clear <b>review articles</b><br>will be scanned for<br>additional reviews<br>related to the key<br>words and these<br>included in the scope<br>if they meet the<br>inclusion criteria |
| Web of<br>Science                           | Stage 1 – as above                                                                                                                                                                                             | Huntingtons* Social*<br>Cog*                                                                                                                                                                                                                                                                                                                         | Limits as previously<br>applied                                                                                                                                                                                                                                                                                             |
| Pubmed                                      | Stage 1 – as above                                                                                                                                                                                             | Huntington* AND<br>social AND cognition                                                                                                                                                                                                                                                                                                              | Defaulted to 2004 to<br>current day<br><br>No other limits<br>applied but searching<br>for titles/abstracts<br>with clear review<br>article hallmarks                                                                                                                                                                       |
| Scopus                                      | Stage 1 – as above                                                                                                                                                                                             | Huntington* AND<br>social AND cognition                                                                                                                                                                                                                                                                                                              | Limits as previously<br>applied + review<br>articles only                                                                                                                                                                                                                                                                   |
| Cinahl                                      | Stage 1 – as above                                                                                                                                                                                             | Social cognition AND<br>Huntingtons disease                                                                                                                                                                                                                                                                                                          | Limits as previously<br>applied                                                                                                                                                                                                                                                                                             |
| Embase / Ovid<br>Medline (R) /<br>Psychinfo | 2. A further (non-umbrella)<br>scoping review of<br><u>quantitative and mixed<br/>methods</u> literature on<br><u>social cognition</u> , social<br>behaviour, and social<br>functioning to the current<br>date | Huntington* AND (<br>Social cogniti* OR<br>Social function OR<br>Social behaviour OR<br>Social interaction OR<br>Social judgement OR<br>Social psychology OR<br>Social understanding<br>OR Social skills OR<br>Social competence OR<br>Social communication                                                                                          | Humans / English<br>Language / 2003 to<br>current (June 2023)<br><br>Due to there being a<br>maximum of key words<br>(which differs in each<br>database), separate<br>searches will be<br>undertaken for<br>different concepts i.e.<br>social cognitive<br>processes such as                                                |

|                                                                                                                |                                                                                                                                                                     |                                                                                                                                                                                                                                                                                                                                                                                                                                                                              |                                                                                                                                                    |
|----------------------------------------------------------------------------------------------------------------|---------------------------------------------------------------------------------------------------------------------------------------------------------------------|------------------------------------------------------------------------------------------------------------------------------------------------------------------------------------------------------------------------------------------------------------------------------------------------------------------------------------------------------------------------------------------------------------------------------------------------------------------------------|----------------------------------------------------------------------------------------------------------------------------------------------------|
|                                                                                                                |                                                                                                                                                                     | OR Social decision making OR<br>Social withdrawal OR<br>avoidance OR<br>disengage)                                                                                                                                                                                                                                                                                                                                                                                           | emotional recognition, or social functioning which will include work<br><br>These will be then be combined if the parameters of the database allow |
| Embase / Ovid<br>Medline (R) /<br>Psychinfo<br><br>Web of<br>Science<br><br>Pubmed<br><br>Scopus<br><br>Cinahl | <b>2.</b> A further (non-umbrella) scoping review of <u>quantitative and mixed methods literature on social cognition, social behaviour, and social functioning</u> | Huntington* AND<br>Non-verbal<br>communication<br><br>Huntington* AND<br>Body language<br><br>Huntington* AND<br>Facial expression<br><br>Huntington* AND<br>Recognition<br><br>Huntington* AND<br>(Theory of mind OR<br>TOM OR simulation<br>theory)<br><br>Huntington* AND<br>(Empath* OR<br>empath*<br>communication)<br><br>Huntington* AND<br>(Mentalizing OR<br>mental state)<br><br>Huntington* AND<br>Emotion*<br><br>Huntington* AND<br>(Inference OR<br>Intuition) | Reflecting social<br>cognitive processes                                                                                                           |
| Embase / Ovid<br>Medline (R) /<br>Psychinfo<br><br>Web of<br>Science<br><br>Pubmed                             | <b>2.</b> A further (non-umbrella) scoping review of <u>quantitative and mixed methods literature on social cognition, social behaviour, and social functioning</u> | Huntington* AND ( Relationships OR<br>interpersonal<br>relationships)<br>Huntington* AND<br>(Social networks OR<br>social connections)                                                                                                                                                                                                                                                                                                                                       | Reflecting social<br>behaviour and<br>functioning                                                                                                  |

|                                                                                                                |                                                                                                                                              |                                                                                                                                                                                                                                                                                                                                                                                                                              |                                             |
|----------------------------------------------------------------------------------------------------------------|----------------------------------------------------------------------------------------------------------------------------------------------|------------------------------------------------------------------------------------------------------------------------------------------------------------------------------------------------------------------------------------------------------------------------------------------------------------------------------------------------------------------------------------------------------------------------------|---------------------------------------------|
| Scopus<br>Cinahl                                                                                               |                                                                                                                                              | Huntington* AND Work<br><br>Huntington* AND Sex*<br><br>Huntington* AND (Function OR skills)                                                                                                                                                                                                                                                                                                                                 |                                             |
| Embase / Ovid<br>Medline (R) /<br>Psychinfo<br><br>Web of<br>Science<br><br>Pubmed<br><br>Scopus<br><br>Cinahl | <b>3.</b> A scoping review of the <u>qualitative literature</u> concerning <u>social cognition, social behaviour and social functioning.</u> | Huntington* AND Non-verbal communication<br><br>Huntington* AND Body language<br><br>Huntington* AND Facial expression<br><br>Huntington* AND Recognition<br><br>Huntington* AND (Theory of mind OR TOM OR simulation theory)<br><br>Huntington* AND (Empath* OR empath* communication)<br><br>Huntington* AND (Mentalizing OR mental state)<br><br>Huntington* AND Emotion*<br><br>Huntington* AND (Inference OR Intuition) | Reflecting social cognitive processes       |
| Embase / Ovid<br>Medline (R) /<br>Psychinfo<br><br>Web of<br>Science<br><br>Pubmed                             | <b>3.</b> A scoping review of the <u>qualitative literature</u> concerning <u>social cognition, social behaviour and social functioning.</u> | Huntington* AND (Relationships OR interpersonal relationships)<br><br>Huntington* AND (Social networks OR social connections)                                                                                                                                                                                                                                                                                                | Reflecting social behaviour and functioning |

|                               |                            |                                                                                                                                                                                                                                   |                                                                                                                                |
|-------------------------------|----------------------------|-----------------------------------------------------------------------------------------------------------------------------------------------------------------------------------------------------------------------------------|--------------------------------------------------------------------------------------------------------------------------------|
| Scopus<br>Cinahl              |                            | Huntington* AND Work<br><br>Huntington* AND Sex*<br><br>Huntington* AND (Function OR skills)                                                                                                                                      |                                                                                                                                |
| Open Grey (EU and UK version) | 4. A grey literature scope | Huntingtons disease                                                                                                                                                                                                               | Neither databases allow for limits                                                                                             |
| Google Scholar                | A grey literature scope    | Huntington* AND (Relationships OR interpersonal relationships)<br><br>Huntington* AND (Social networks OR social connections)<br><br>Huntington* AND Work<br><br>Huntington* AND Sex*<br><br>Huntington* AND (Function OR skills) | Limits 2003 – 2023                                                                                                             |
| Researchgate                  | A grey literature scope    | Huntingtons disease                                                                                                                                                                                                               | Author to scan first 25 pages on results for all literature relevant to the concepts of social cognition OR social functioning |

Stage 5 - Please apply to the author for the search details of the message board as per the protocol published
